# Supplementary material for: Furanocoumarin Notopterol: Inhibition of Hepatocellular Carcinogenesis through Suppression of Cancer Stemness Signaling and Induction of Oxidative Stress-Associated Cell Death
Source: MDPI journal article supplement (doi:10.3390/nu15112447), 2023-05-24
Supplement: s1 [file s1]

**Furanocoumarin Notopterol: Inhibition of Hepatocellular Carcinogenesis through Suppression of Cancer Stemness Signaling and Induction of Oxidative Stress-Associated Cell Death**

Ting-Yun Huang <sup>1,2,3,†</sup>, Ching-Kuo Yang <sup>4,†</sup>, Ming-Yao Chen <sup>5,6</sup>, Vijesh Kumar Yadav <sup>5,6</sup>, Iat-Hang Fong <sup>5,6</sup>, Chi-Tai Yeh <sup>5,6,7,\*</sup> and Yih-Giun Cherng <sup>8,9,\*</sup>

1 Department of Emergency Medicine, Shuang-Ho Hospital, Taipei Medical University, New Taipei City 23561, Taiwan; 19123@s.tmu.edu.tw

2 Graduate Institute of Injury Prevention and Control, College of Public Health, Taipei Medical University, Taipei City 11031, Taiwan

3 Department of Emergency Medicine, School of Medicine, Taipei Medical University, Taipei City 11031, Taiwan

4 Division of Colorectal Surgery, Department of Surgery, Mackay Memorial Hospital, Taipei City 10449, Taiwan; yangchingkao@yahoo.com.tw

5 Division of Gastroenterology and Hepatology, Department of Internal Medicine, School of Medicine, College of Medicine, Taipei Medical University, Taipei City 11031, Taiwan; 08350@s.tmu.edu.tw (M.-Y.C.); vijeshp2@gmail.com (V.K.Y.); 18149@s.tmu.edu.tw (I.-H.F.)

6 Division of Gastroenterology and Hepatology, Department of Internal Medicine, Shuang Ho Hospital, New Taipei City 235041, Taiwan

7 Continuing Education Program of Food Biotechnology Applications, College of Science and Engineering, National Taitung University, Taitung 95092, Taiwan

8 Department of Anesthesiology, Shuang Ho Hospital, Taipei Medical University, New Taipei City 23561, Taiwan

9 Department of Anesthesiology, School of Medicine, College of Medicine, Taipei Medical University, Taipei City 11031, Taiwan

\* Correspondence: ctyeh@s.tmu.edu.tw (C.-T.Y.); stainless@s.tmu.edu.tw (Y.-G.C.); Tel.: +886-2-2490088 (ext. 8881) (C.-T.Y.); +886-2-2490088 (ext. 8885) (Y.-G.C.)

† These authors have contributed equally to this work.

**Supplementary Table S1.** The membranes were incubated in primary antibodies.

| No. | Target           | Dilution | MW  | Source    |                |
|-----|------------------|----------|-----|-----------|----------------|
| 1   | ATF4             | 1:1000   | 50  | ab184909  | abcam          |
| 2   | p-JAK2           | 1:500    | 125 | #3776     | Cell signaling |
| 3   | JAK2             | 1:1000   | 125 | #3230     | Cell signaling |
| 4   | GPX1             | 1:2000   | 22  | ab108427  | abcam          |
| 5   | Catalase         | 1:2000   | 60  | ab209211  | abcam          |
| 6   | SOD1             | 1:2000   | 23  | ab13498   | abcam          |
| 7   | Vimentin         | 1:2000   | 57  | sc-373717 | Santa Cruz     |
| 8   | Snail            | 1:1000   | 29  | sc-271977 | Santa Cruz     |
| 9   | $\beta$ -catenin | 1:1000   | 92  | sc-133240 | Santa Cruz     |
| 10  | N-cadherin       | 1:1000   | 130 | sc-8424   | Santa Cruz     |
| 11  | Oct-04           | 1:1000   | 45  | sc-5279   | Santa Cruz     |
| 12  | CD133            | 1:1000   | 120 | sc-365537 | Santa Cruz     |
| 13  | SOX2             | 1:1000   | 34  | sc-365964 | Santa Cruz     |
| 14  | Bcl-2            | 1:1000   | 26  | ab32124   | abcam          |
| 15  | PARP1            | 1:1000   | 113 | ab191217  | abcam          |
| 16  | cleaved PARP1    | 1:1000   | 25  | ab32064   | abcam          |
| 17  | ALDH1            | 1:1000   | 55  | #12035    | Cell signaling |
| 18  | CHOP             | 1:1000   | 27  | #2895     | Cell signaling |
| 19  | PERK             | 1:1000   | 140 | #5683     | Cell signaling |
| 20  | GAPDH            | 1:1000   | 37  | sc-32233  | Santa Cruz     |

**Supplementary Table S2.** List of gene specific primers with detailed sequence used in this study

| No. | Target | Primer | Sequence                |
|-----|--------|--------|-------------------------|
| 1   | OCT4   | F      | CCTGAAGCAGAAGAGGATCACC  |
|     |        | R      | AAAGCGGCAGATGGTCGTTTGG  |
| 2   | SOX2   | F      | GCTACAGCATGATGCAGGACCA  |
|     |        | R      | TCTGCGAGCTGGTCATGGAGTT  |
| 3   | ALDH1  | F      | CGGGAAAAGCAATCTGAAGAGGG |
|     |        | R      | GATGCGGCTATACAACACTGGC  |
| 4   | SOD1   | F      | CTCACTCTCAGGAGACCATTGC  |
|     |        | R      | CCACAAGCCAAACGACTTCCAG  |
| 5   | GPX1   | F      | GTGCTCGGCTTCCCGTGCAAC   |
|     |        | R      | CTCGAAGAGCATGAAGTTGGGC  |
| 6   | CHOP   | F      | GGTATGAGGACCTGCAAGAGGT  |
|     |        | R      | CTTGTGACCTCTGCTGGTTCTG  |
| 7   | PERK   | F      | GTCCCAAGGCTTTGGAATCTGTC |
|     |        | R      | CCTACCAAGACAGGAGTTCTGG  |

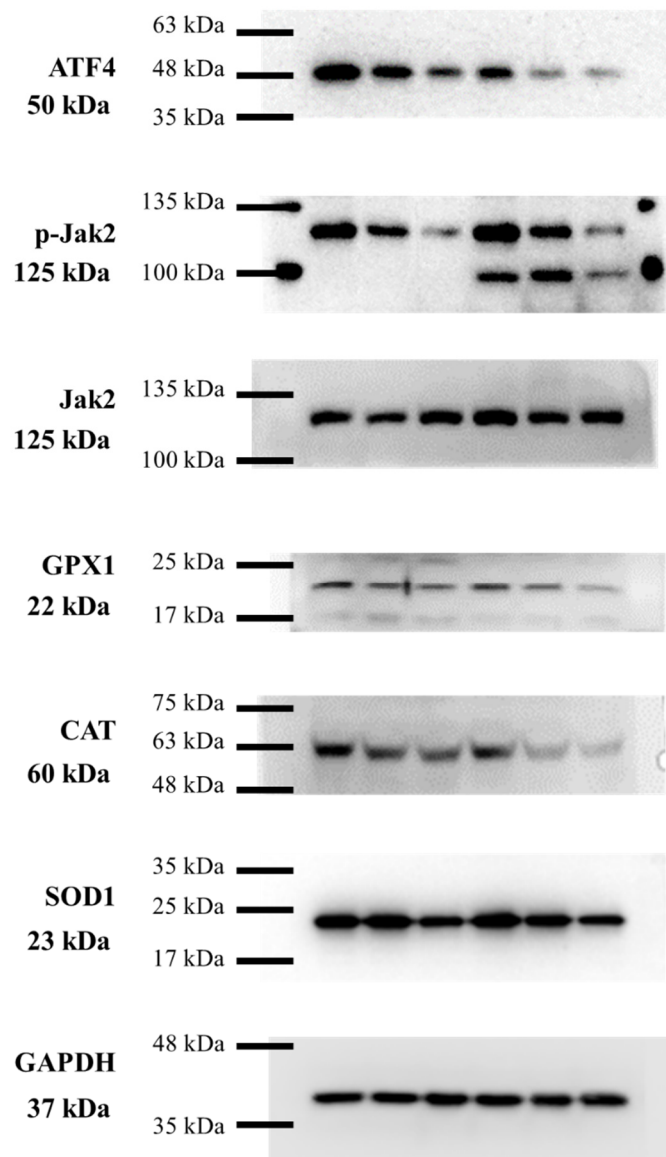

**Supplementary Figure S1.** Full western-blotting result of representative image in Figure 1D.

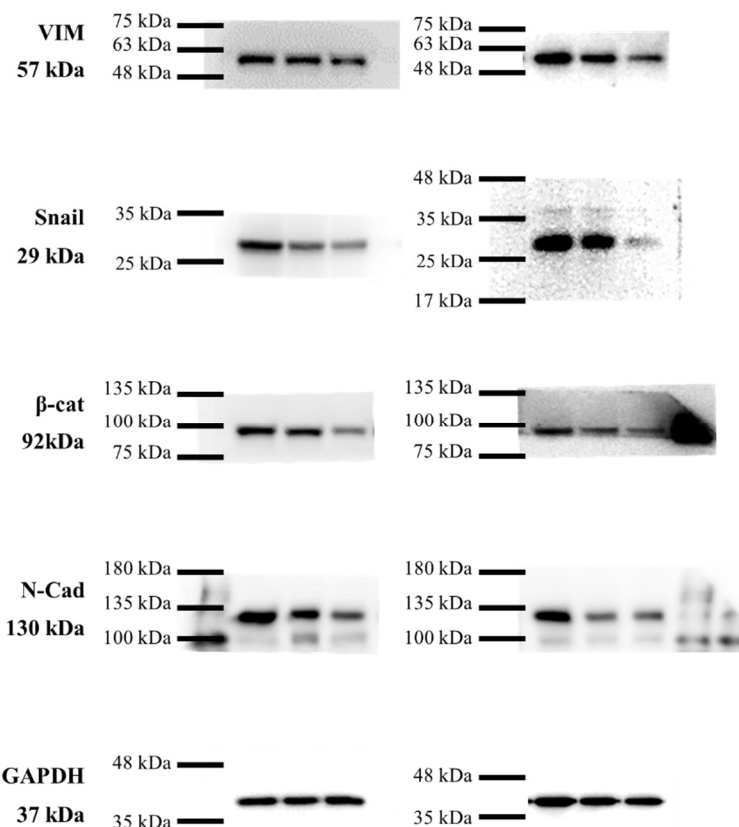

**Supplementary Figure S2.** Full western-blotting result of representative image in Figure 2C.

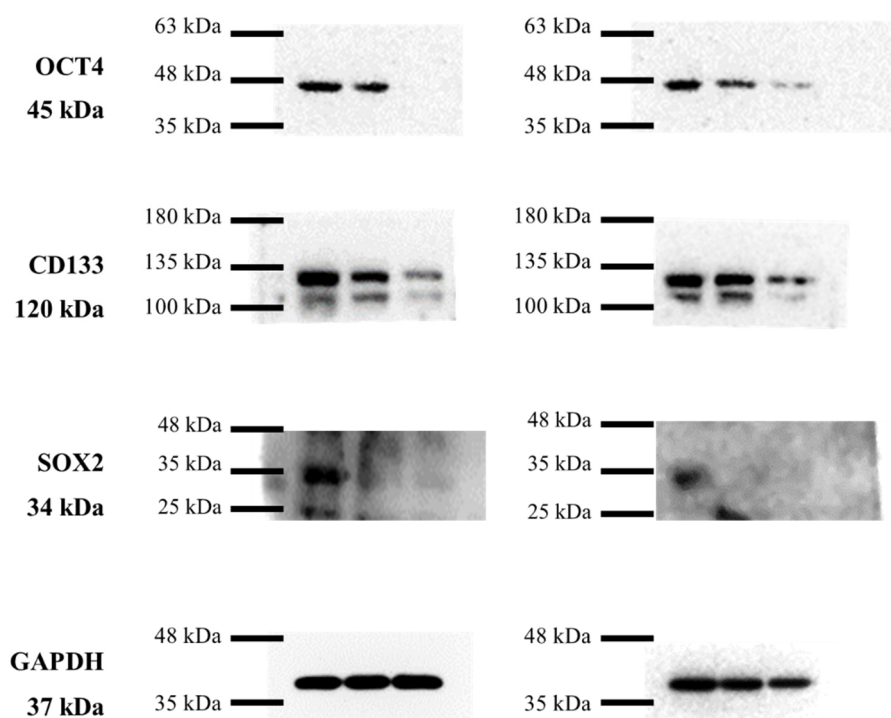

**Supplementary Figure S3.** Full western-blotting result of representative image in Figure 3C.

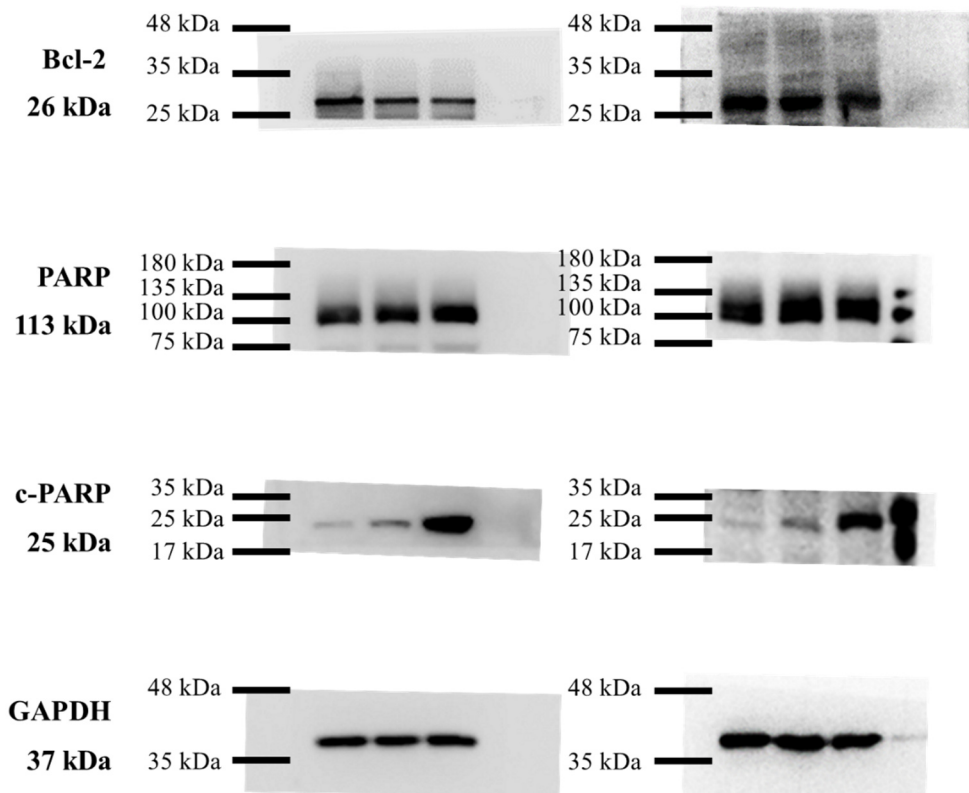

**Supplementary Figure S4.** Full western-blotting result of representative image in Figure 3D.

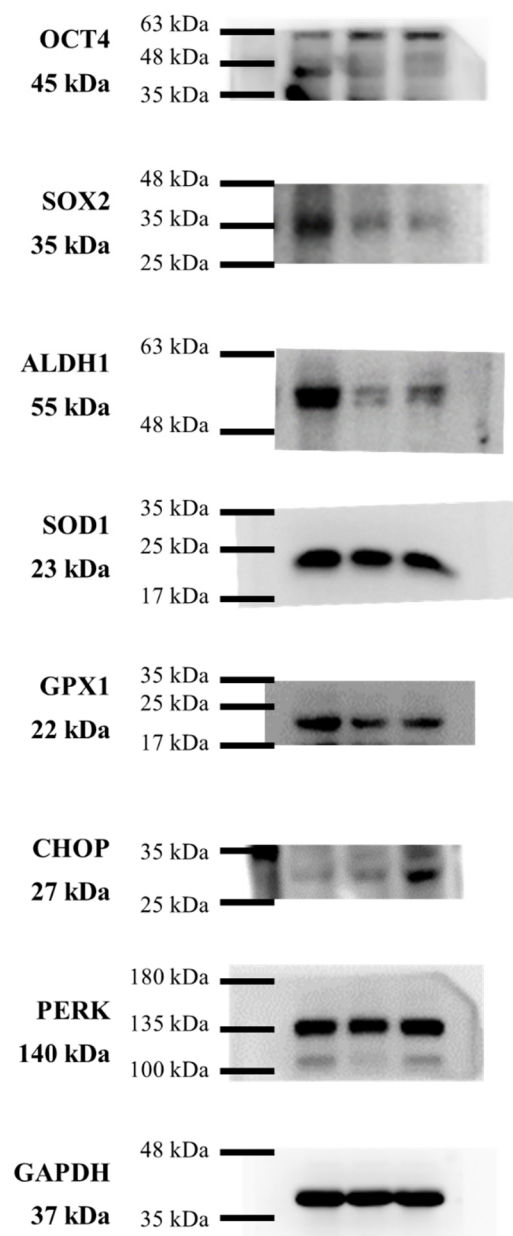

**Supplementary Figure S5.** Full western-blotting result of representative image in Figure 5F.
